# Supplementary material for: Construction of coacervate-in-coacervate multi-compartment protocells for spatial organization of enzymatic reactions
Source: Royal Society of Chemistry journal article supplement (doi:10.1039/d0sc03849k), 2020-01-01
Supplement: d0sc03849k2.pdf [file d0sc03849k2.pdf]

## Supporting Information

### Construction of coacervate-in-coacervate multi-compartment protocells for spatial organization of enzymatic reactions

Yufeng Chen, Min Yuan, Yanwen Zhang, Songyang Liu, Xiaohai Yang, Kemin Wang\*, and Jianbo Liu\*

State Key Laboratory of Chemo/Biosensing and Chemometrics, College of Chemistry and Chemical Engineering, Key Laboratory for Bio-Nanotechnology and Molecular Engineering of Hunan Province, Hunan University, Changsha 410082, P. R. China. Email: kmwang@hnu.edu.cn, liujianbo@hnu.edu.cn

#### Legends

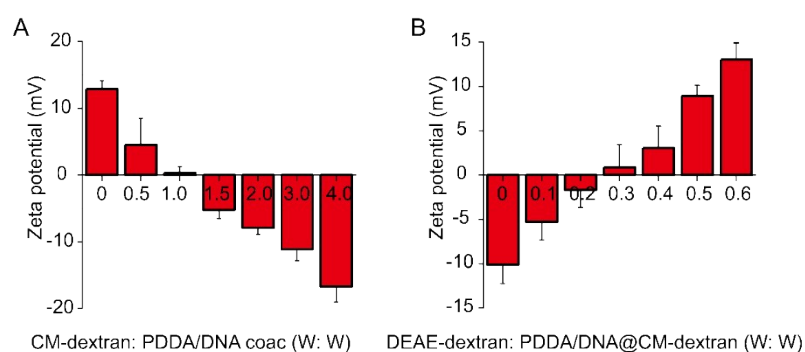

**Fig. S1.** (A) Zeta potential measurements of PDDA/DNA@CM-dextran coacervate microdroplets after addition of different weight ratios of CM-dextran into PDDA/DNA coacervates (0-4.0 in weight). (B) The zeta potential measurements of PDDA/DNA@CM-dextran/DEAE-dextran coacervate microdroplets by addition of different ratio of CM-dextran and DEAE-dextran based on 0.1 mL PDDA/DNA coacervate.

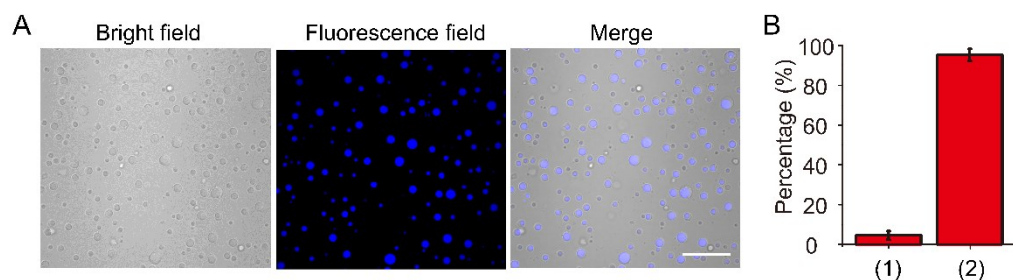

**Fig. S2.** Confocal images of PDDA/DNA@DEAE-dextran/CM-dextran coacervate microdroplets and the quantitative statistical analysis of the multi-compartment structures. (A) Bright field, (B) fluorescence field, (C) Merge field. (D) Statistical charts for the number percentage of the single-compartment (1), and multi-compartment (2). The microdroplets were prepared at DEAE-dextran/CM-dextran weight ratios of 0.3. Scale bar: 50  $\mu$ m.

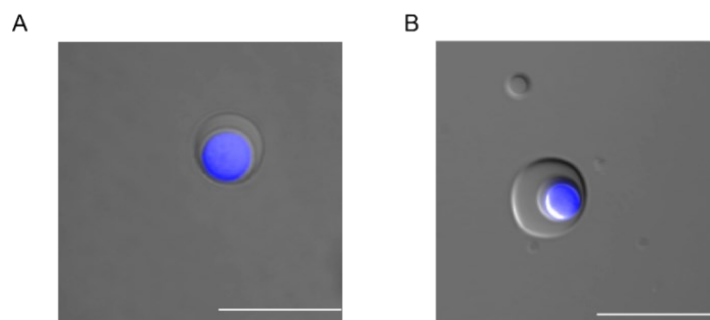

**Fig. S3.** PDDA/DNA coacervate encapsulated in individual CM-dextran/DEAE-dextran coacervate microdroplet determined from optical microscopy image. The two-tiered coacervate were prepared under constant conditions but at different DEAE-dextran/CM-dextran mass ratios of **(A)** 0.3, **(B)** 1.0. Scale bar: 20  $\mu\text{m}$ .

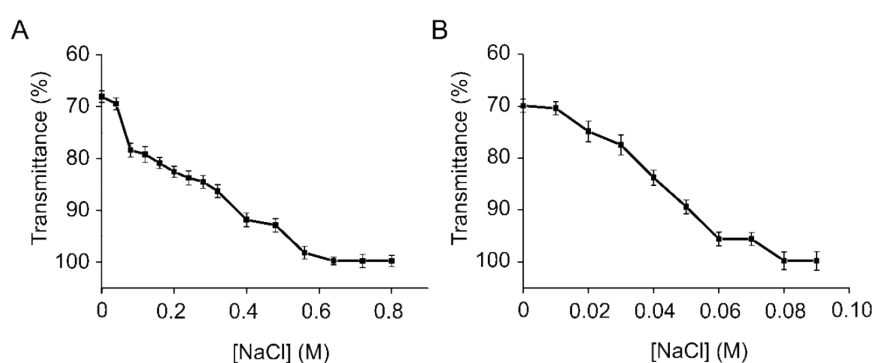

**Fig. S4.** **(A)** Transmittance determination of PDDA/DNA coacervates under different concentrations of NaCl (0-0.8 M). PDDA/DNA coacervate: 5  $\text{mg}\cdot\text{ml}^{-1}$ . pH = 8.0. **(B)** Transmittance determination of DEAE-dextran/CM-dextran coacervates under different concentrations of NaCl (0-0.09 M). DEAE-dextran/CM-dextran coacervate: 5  $\text{mg}\cdot\text{ml}^{-1}$ . pH = 8.0.

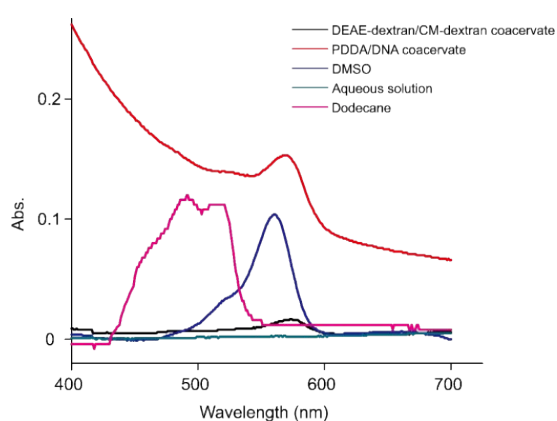

**Fig. S5.** UV-vis spectrum of Nile red at different solutions. Nile red-containing DEAE-dextran/CM-dextran microdroplets (black), Nile red-containing PDDA/DNA coacervate (red), Nile red DMSO solution (blue), Nile red aqueous solution (purple), and dodecane solution (pink). Nile red in DEAE-dextran/CM-dextran and PDDA/DNA microdroplets at pH = 8 showing broad band with absorption

peak at 574, and 570 nm respectively.

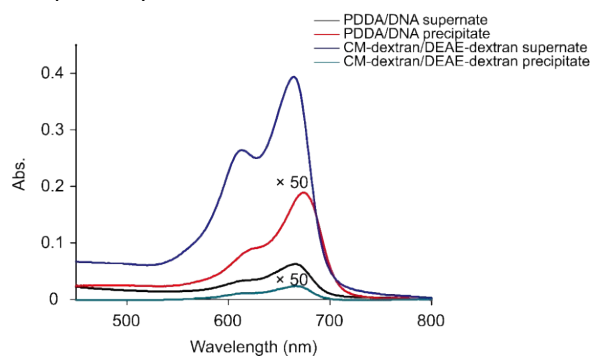

**Fig. S6.** UV-Vis absorption spectra of methylene blue (Peak: 674 nm) in coacervate phase and supernatant continuous phase. Coacervate microdroplet was separated from bulk aqueous phase by centrifugation at 12,000 rpm for 15 min. The PDDA/DNA and CM-dextran/DEAE-dextran coacervate phase were diluted with 50 times. The partition coefficients of methylene blue in PDDA/DNA and DEAE-dextran/CM-dextran coacervate phases were determined to be 169 and 3.8, respectively.

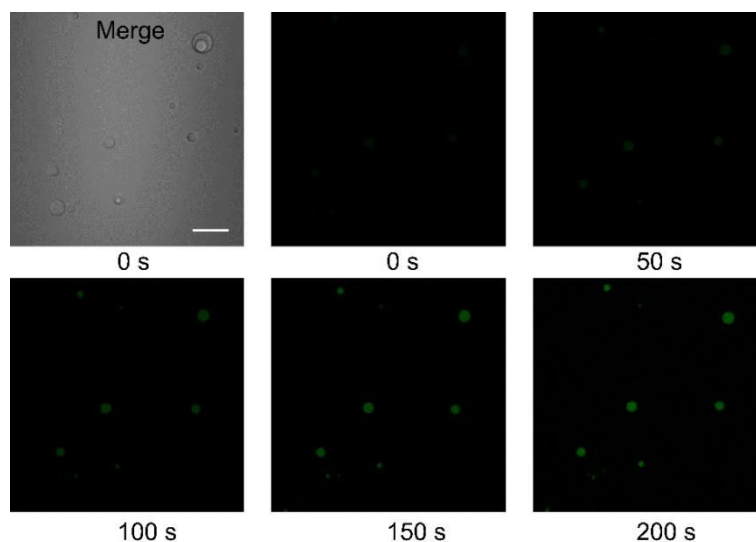

**Fig. S7.** The diffusion transport of small molecule (fluorescein) in PDDA/DNA @CM-dextran/ DEAE-dextran coacervate by time scan confocal imaging. PDDA/DNA@CM-dextran/DEAE-dextran coacervate was prior prepared and then added 0.02 mg/mL fluorescein dye. Scale bar: 20  $\mu$ m.

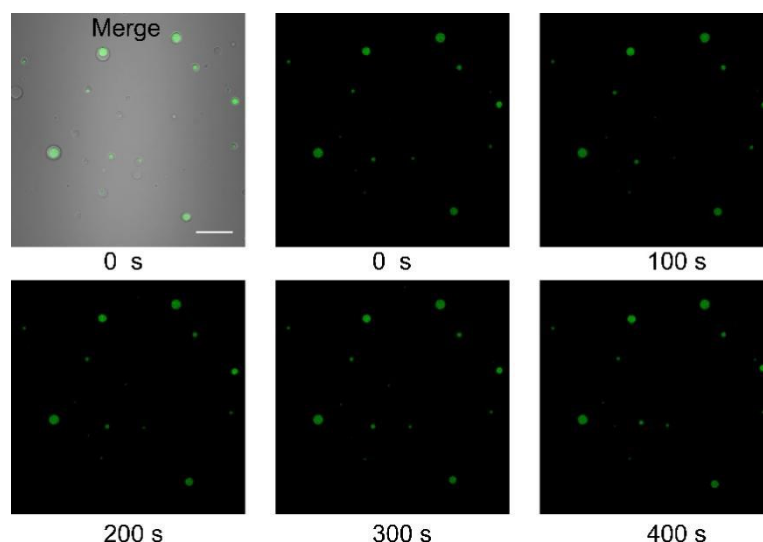

**Fig. S8.** The diffusion transport of macromolecule (FITC-CAT) in PDDA/DNA@CM-dextran/ DEAE-dextran coacervate by time scan confocal imaging. (FITC-CAT ( $0.02 \text{ mg mL}^{-1}$ )) was prior encapsulated in PDDA/DNA coacervate by layer-by-layer assembly method. Scale bar:  $20 \mu\text{m}$ .

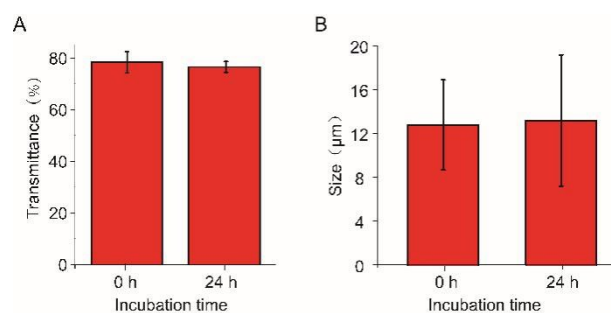

**Fig. S9.** (A) Transmittance determination, and (B) size determination of PDDA/DNA@CM-dextran/DEAE-dextran coacervate microdroplets at different incubation times. The transmittance of the microdroplets was determined through UV-vis absorption spectra. The size of the microdroplets was determined through dynamic light scattering. After 24 h, a shake facilitated the re-dispersion of the microdroplets.

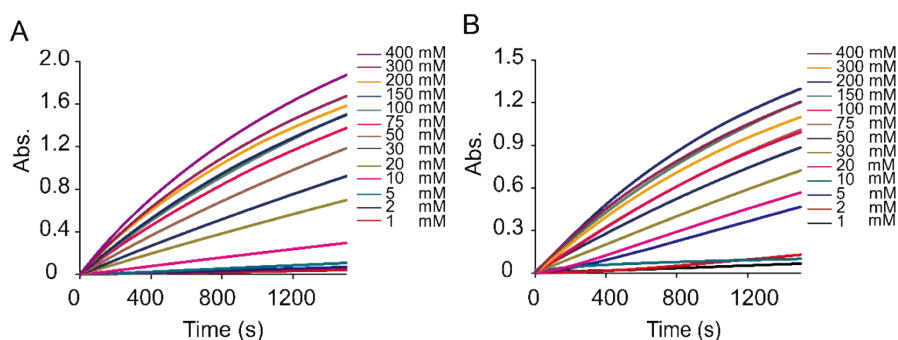

**Fig. S10.** Time dependent absorbance change of ABTS at 410 nm catalyzed by GOx and HRP, in the presence of glucose (1-400 mM). (A) GOx in aqueous PBS buffer solution, pH = 7.4. (B) GOx loaded in coacervate-in-coacervate structure. GOx:  $0.08 \mu\text{g}\cdot\text{mL}^{-1}$ ; HRP:  $0.22 \mu\text{g}\cdot\text{mL}^{-1}$ , ABTS:  $2.0 \text{ mM}$ .

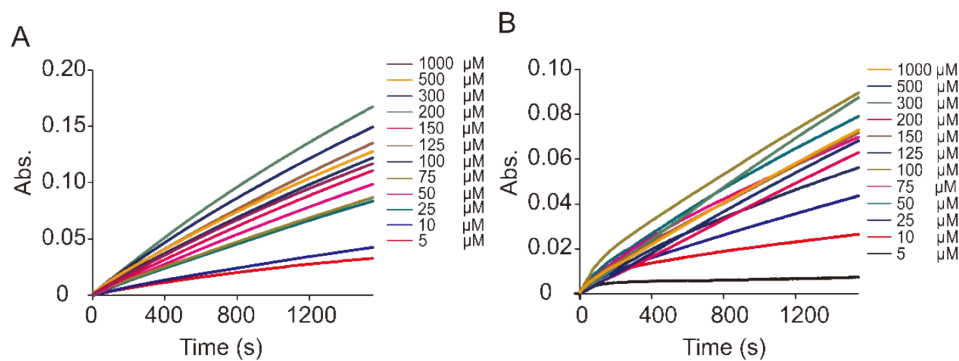

**Fig. S11.** Time dependent absorbance change of ABTS at 410 nm catalyzed by H<sub>2</sub>O<sub>2</sub> and HRP, in the presence of different amounts of H<sub>2</sub>O<sub>2</sub> (5-1000 μM). (A) HRP in aqueous PBS buffer solution, pH = 7.4. (B) HRP loaded in coacervate microdroplets. HRP: 0.022 μg·mL<sup>-1</sup>, ABTS: 2.0 mM.

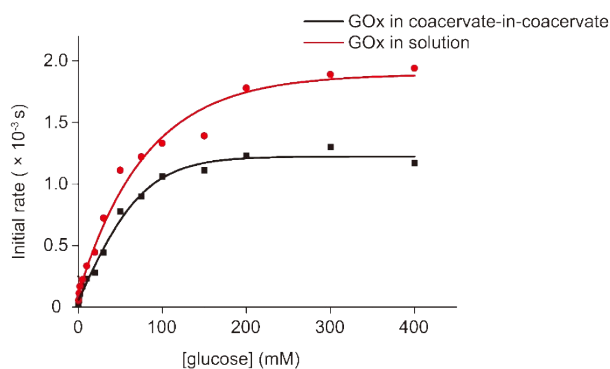

**Fig. S12.** Michaelis–Menten kinetics fitting of GOx via the ABTS colorimetric method, determined in 10 mM PBS buffer (pH 7.4, red line) and in a coacervate-in-coacervate structure (black line). GOx: 0.08 μg·mL<sup>-1</sup>; HRP: 0.22 μg·mL<sup>-1</sup>, ABTS: 2.0 mM.

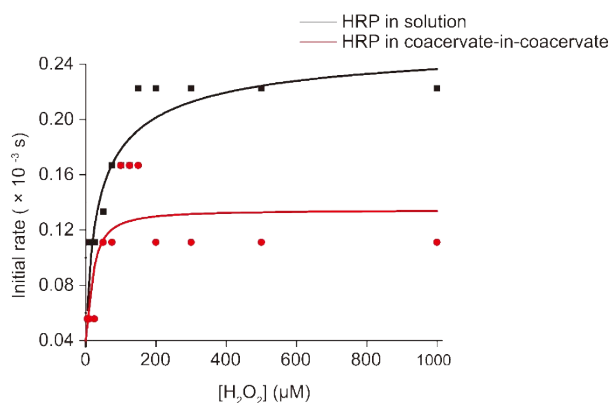

**Fig. S13.** Michaelis–Menten kinetics fitting of HRP via the ABTS colorimetric method, determined in 10 mM PBS buffer (pH 7.4, black line) and in a coacervate-in-coacervate structure (red line). HRP: 0.022 μg·mL<sup>-1</sup>, ABTS: 2.0 mM.

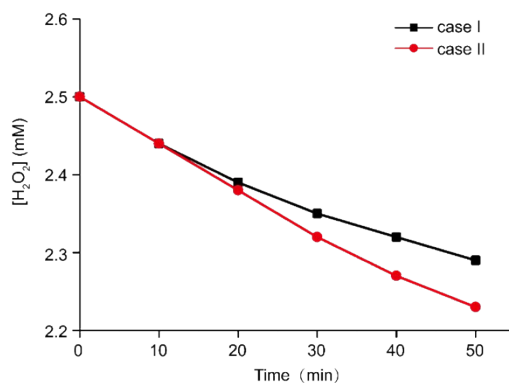

**Fig. S14.** The decomposition of H<sub>2</sub>O<sub>2</sub> via UV-Vis absorption spectra, determined in 10 mM PBS buffer by CAT-mediated enzymatic reaction in the case I, case II, respectively.

**Table S1.** physical and chemical parameters of different coacervate phases.

| Coacervate phases       | partition coefficient | dielectric constant | Density |
|-------------------------|-----------------------|---------------------|---------|
| PDDA/DNA                | 169                   | 60.3                | 2.1     |
| DEAE-dextran/CM-dextran | 3.8                   | 66.3                | 1.5     |

<sup>a</sup> The partition coefficient was determined by using methylene blue probe;

<sup>b</sup> The dielectric constant was determined by using Nile red probe.

**Table S2.** The encapsulation efficiency of GOx, HRP and catalase in cases I and II.

| encapsulation efficiency | GOx   | HRP   | CAT   |
|--------------------------|-------|-------|-------|
| inner coac-in-coac       | 97.6% | 97.6% | 98.6% |
| Outer coac-in-coac       | 97.5% | 97.5% | 98.2% |

**Table S3.** Michaelis-Menten constant (K<sub>m</sub>) of GOx, and HRP in coacervate or solution.

|                   | GOx /mM | HRP/ μM |
|-------------------|---------|---------|
| Buffer solution   | 44.2    | 12.6    |
| Coacervate matrix | 96.6    | 30.5    |
